# Supplementary material for: Synthesis and photophysics of new pyridyl end-capped 3D-dithia[3.3]paracyclophane-based Janus tectons: surface-confined self-assembly of their model pedestal on HOPG
Source: Royal Society of Chemistry journal article supplement (doi:10.1039/d0nj00110d), 2020-01-01

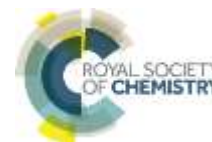

NJC

## SUPPORTING INFORMATION

### **Synthesis and photophysics of new pyridyl end-capped 3D-dithia[3.3]paracyclophane-based Janus tectons: surface-confined self-assembly of their model pedestal on HOPG**

Received 00th January 20xx,  
Accepted 00th January 20xx

DOI: 10.1039/x0xx00000x

[www.rsc.org/](http://www.rsc.org/)

M. Auffray,<sup>a</sup> F. Charra,<sup>b</sup> L. Sosa Vargas,<sup>a</sup> F. Mathevet<sup>a</sup>, A-J. Attias<sup>a</sup> and D. Kreher<sup>a\*</sup>

<sup>a</sup> Sorbonne Université, UPMC Univ Paris 06, Institut Parisien de Chimie Moléculaire, UMR CNRS 8232, 4 Place Jussieu, 75252 Paris Cedex 05, France.

<sup>b</sup> Service de Physique de l'Etat Condensé, CEA CNRS Université Paris-Saclay, CEA Saclay, F-91191 Gif-sur-Yvette Cedex, France.  
corresponding author : david.kreher@sorbonne-universite.fr, andre-jean.attias@sorbonne-universite.fr

#### CONTENTS

<sup>1</sup>H and <sup>13</sup>C NMR spectra in CDCl<sub>3</sub> of the new intermediate synthons are reported here, except when too complicated due to isomer mixtures that could not be separated, as well as the high-resolution mass spectra of the target compounds **P**, **C** and **JT**. To end we report also the infrared (IR) spectra recorded on bulk after evaporation or filtration of the supramolecular complexes prepared in solution by simply mixing **P** with bis(benzonitrile)-palladium(II) for coordination (**P-Pd<sup>II</sup>**), terephthalic acid for hydrogen bond (**P-TPA**) and finally 1,4-diiodobenzene for halogen bond (**P-IPhI**).

|                                                                                |   |
|--------------------------------------------------------------------------------|---|
| Figure S1 : <sup>1</sup> H NMR (300 MHz) spectrum of compound <b>1</b> .....   | 3 |
| Figure S2 : <sup>13</sup> C NMR (300 MHz) spectrum of compound <b>1</b> .....  | 3 |
| Figure S3 : <sup>1</sup> H NMR (300 MHz) spectrum of compound <b>2</b> .....   | 4 |
| Figure S4 : <sup>13</sup> C NMR (300 MHz) spectrum of compound <b>2</b> .....  | 4 |
| Figure S5 : <sup>1</sup> H NMR (300 MHz) spectrum of compound <b>3</b> .....   | 5 |
| Figure S6 : <sup>13</sup> C NMR (300 MHz) spectrum of compound <b>3</b> .....  | 5 |
| Figure S7 : <sup>1</sup> H NMR (300 MHz) spectrum of compound <b>4</b> .....   | 6 |
| Figure S8 : <sup>13</sup> C NMR (300 MHz) spectrum of compound <b>4</b> .....  | 6 |
| Figure S9 : <sup>1</sup> H NMR (300 MHz) spectrum of compound <b>5</b> .....   | 7 |
| Figure S10 : <sup>13</sup> C NMR (300 MHz) spectrum of compound <b>5</b> ..... | 7 |
| Figure S11 : <sup>1</sup> H NMR (300 MHz) spectrum of compound <b>6</b> .....  | 8 |
| Figure S12 : <sup>13</sup> C NMR (300 MHz) spectrum of compound <b>6</b> ..... | 8 |

|                                                                                                                                                                                                    |    |
|----------------------------------------------------------------------------------------------------------------------------------------------------------------------------------------------------|----|
| Figure S13 : <sup>1</sup> H NMR (300 MHz) spectrum of compound <b>7</b> .....                                                                                                                      | 9  |
| Figure S14 : <sup>13</sup> C NMR (300 MHz) spectrum of compound <b>7</b> .....                                                                                                                     | 9  |
| Figure S15 : <sup>1</sup> H NMR (300 MHz) spectrum of compound <b>8b</b> .....                                                                                                                     | 10 |
| Figure S16 : <sup>13</sup> C NMR (300 MHz) spectrum of compound <b>8b</b> .....                                                                                                                    | 10 |
| Figure S17 : <sup>1</sup> H NMR (300 MHz) spectrum of compound <b>9a</b> .....                                                                                                                     | 11 |
| Figure S18 : <sup>13</sup> C NMR (300 MHz) spectrum of compound <b>9a</b> .....                                                                                                                    | 11 |
| Figure S19 : <sup>1</sup> H NMR (300 MHz) spectrum of compound <b>10a</b> .....                                                                                                                    | 12 |
| Figure S20 : <sup>13</sup> C NMR (300 MHz) spectrum of compound <b>10a</b> .....                                                                                                                   | 12 |
| Figure S21 : <sup>1</sup> H NMR (300 MHz) spectrum of compound <b>P</b> .....                                                                                                                      | 13 |
| Figure S22 : <sup>13</sup> C NMR (300 MHz) spectrum of compound <b>P</b> .....                                                                                                                     | 13 |
| Figure S23 : <sup>1</sup> H NMR (300 MHz) spectrum of compound <b>C</b> .....                                                                                                                      | 14 |
| Figure S24 : <sup>13</sup> C NMR (300 MHz) spectrum of compound <b>C</b> .....                                                                                                                     | 14 |
| Figure S25 : <sup>1</sup> H NMR (300 MHz) spectrum of compound <b>JT</b> .....                                                                                                                     | 15 |
| Figure S26 : HRMS for compound <b>P</b> .....                                                                                                                                                      | 15 |
| Figure S27 : HRMS for compound <b>C</b> .....                                                                                                                                                      | 16 |
| Figure S28 : HRMS for compound <b>JT</b> .....                                                                                                                                                     | 17 |
| Figure S29 : IR spectra recorded on bulk after evaporation or filtration of the supramolecular complexes prepared.....                                                                             | 18 |
| in solution by simply mixing P with bis(benzonitrile)-palladium(II) for coordination (P-PdII), terephthalic acid for hydrogen bond (P-TPA) and finally 1,4-diodobenzene for halogen bond (P-IPhI). |    |

Figure S1.  $^1\text{H}$  NMR (300 MHz,  $\text{CDCl}_3$ ) spectrum of compound **1**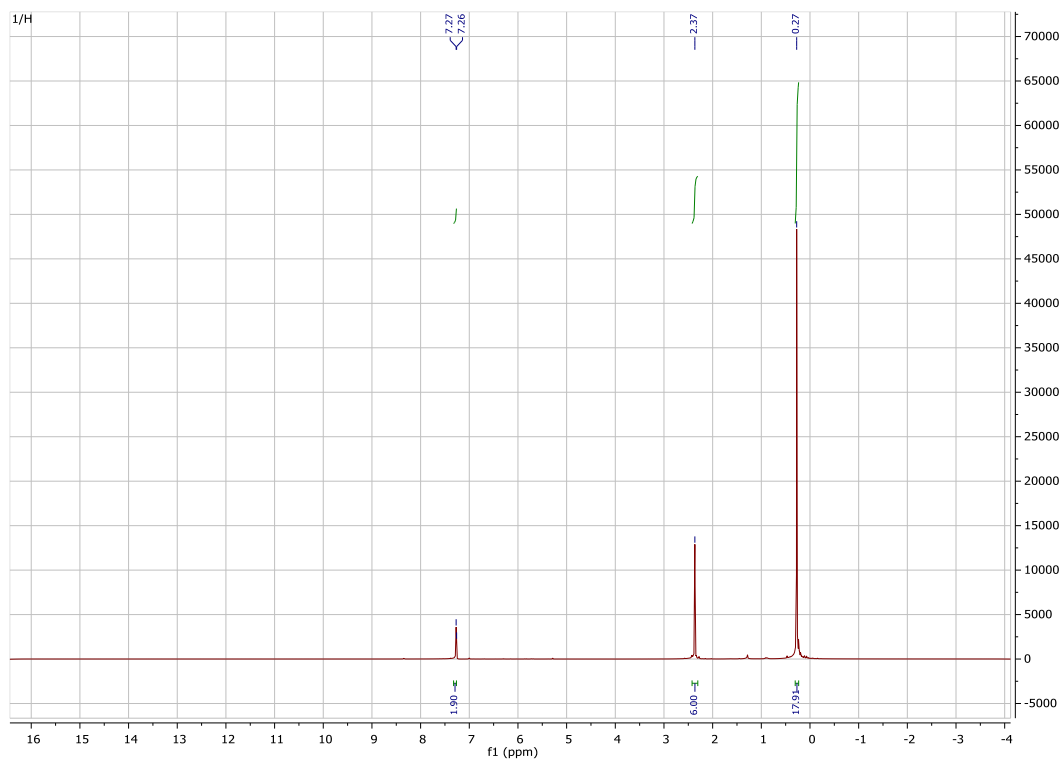Figure S2 :  $^{13}\text{C}$  NMR (300 MHz,  $\text{CDCl}_3$ ) spectrum of compound **1**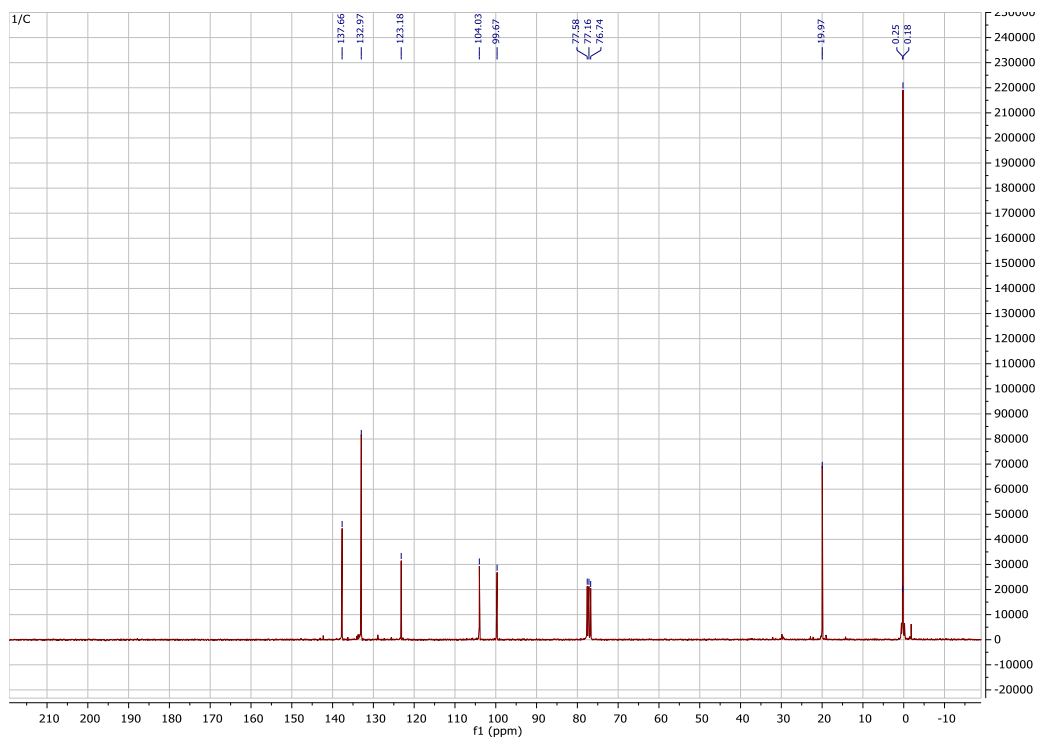

Figure S3 :  $^1\text{H}$  NMR (300 MHz,  $\text{CDCl}_3$ ) spectrum of compound **2**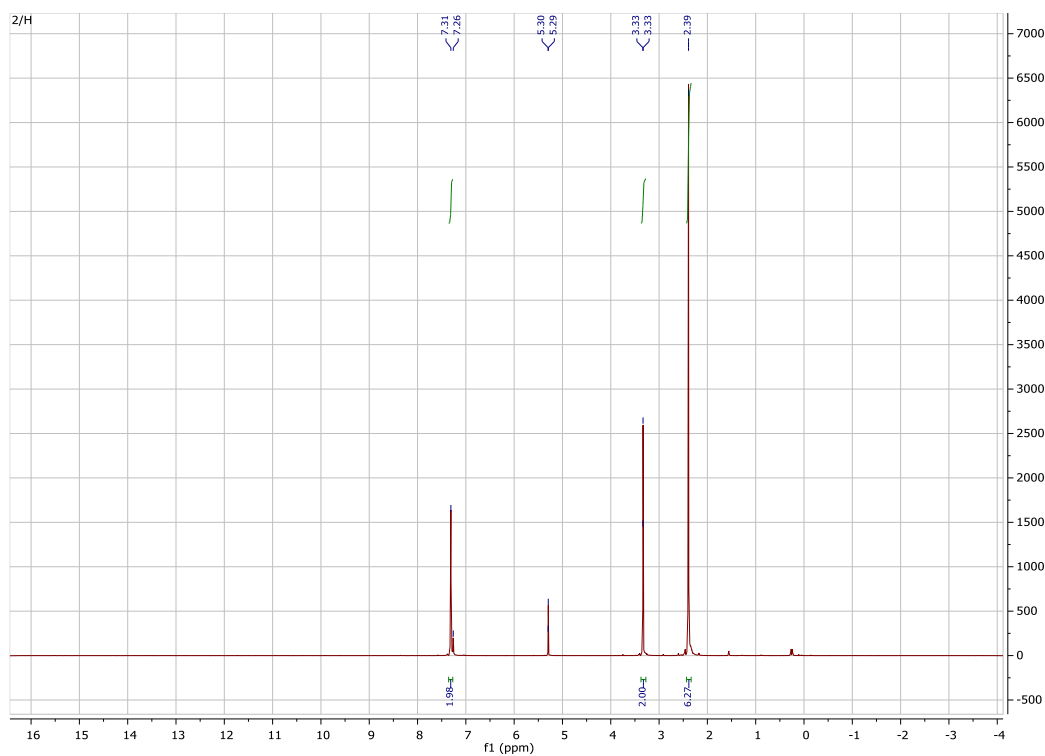Figure S4 :  $^{13}\text{C}$  NMR (300 MHz,  $\text{CDCl}_3$ ) spectrum of compound **2**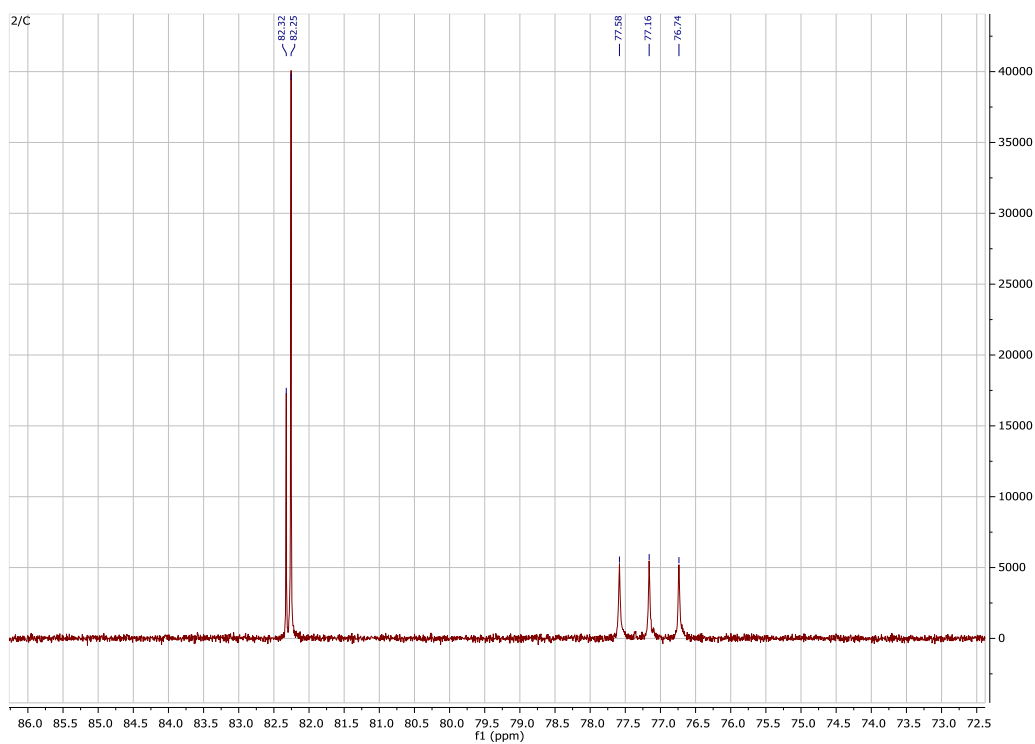

Figure S5 :  $^1\text{H}$  NMR (300 MHz,  $\text{CDCl}_3$ ) spectrum of compound **3**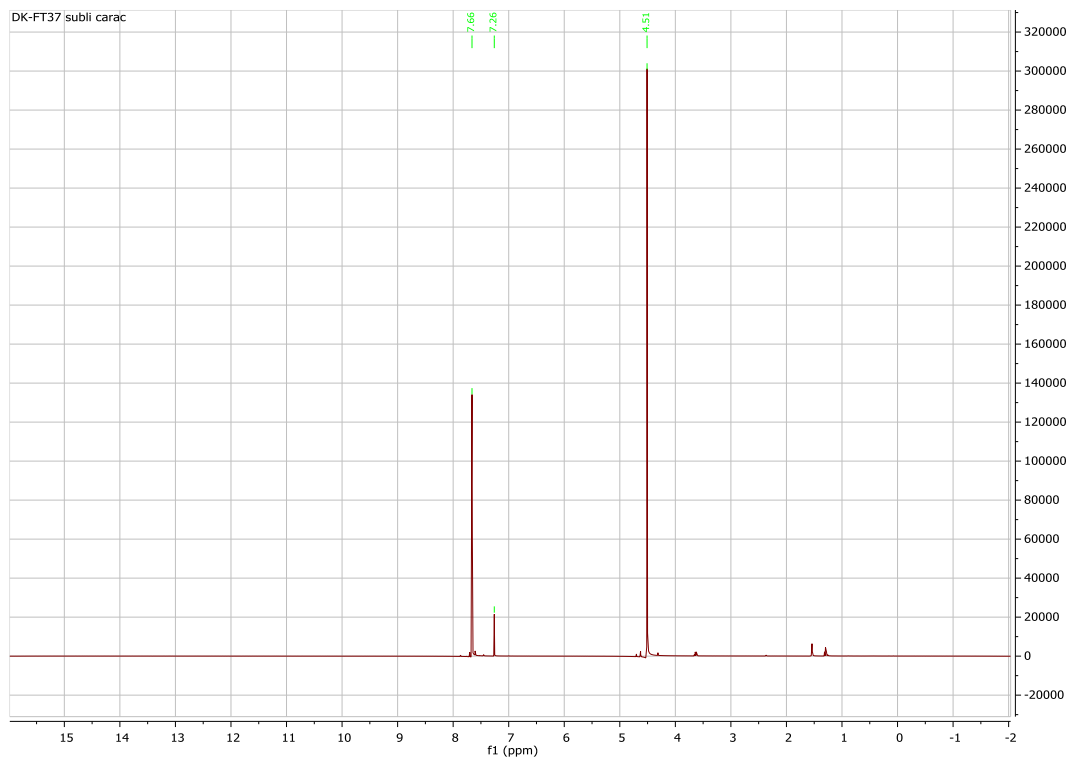Figure S6 :  $^{13}\text{C}$  NMR (300 MHz,  $\text{CDCl}_3$ ) spectrum of compound **3**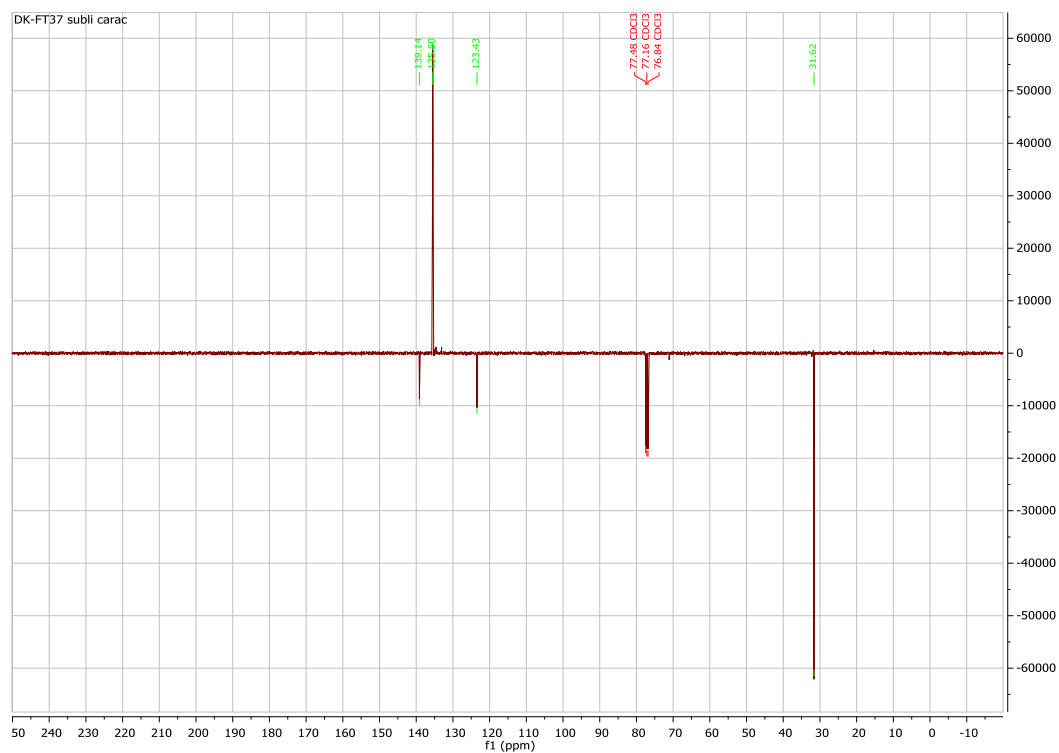

Figure S7 :  $^1\text{H}$  NMR (300 MHz,  $\text{CDCl}_3$ ) spectrum of compound **4**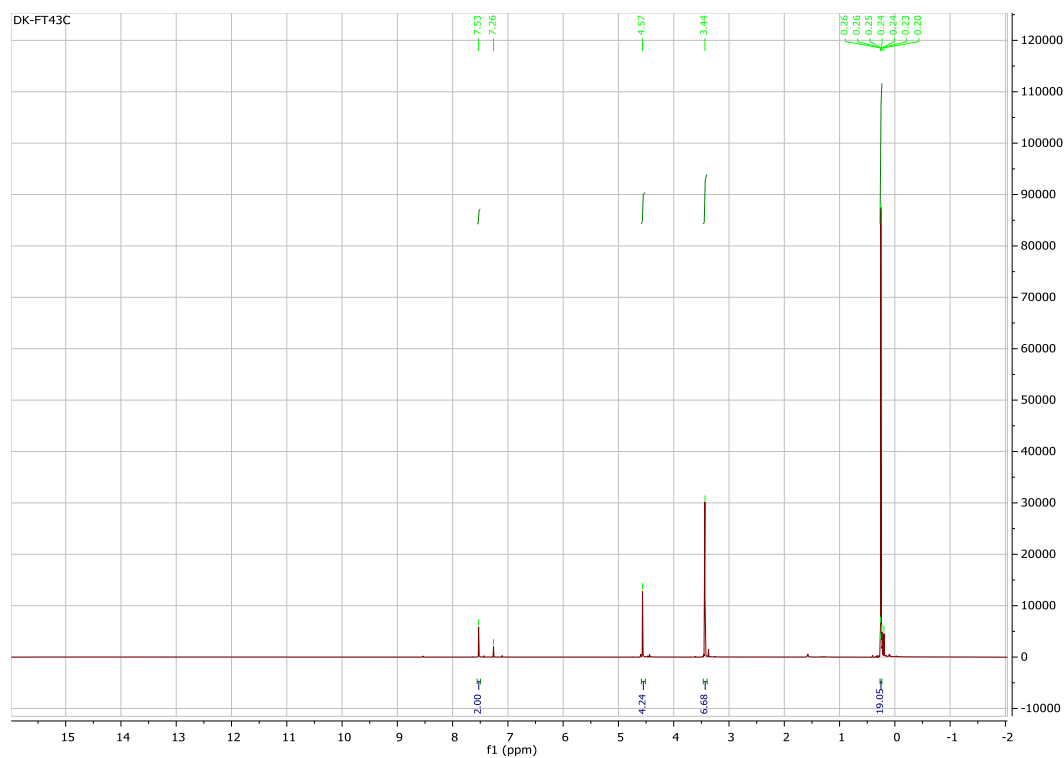Figure S8 :  $^{13}\text{C}$  NMR (300 MHz,  $\text{CDCl}_3$ ) spectrum of compound **4**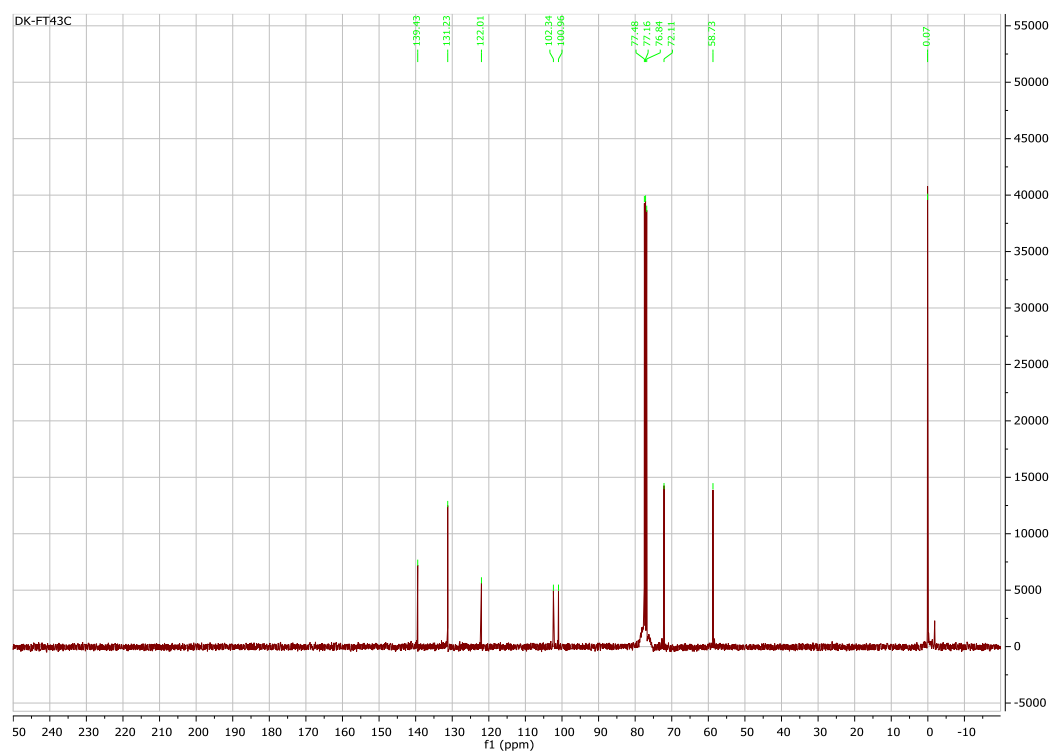

Figure S9 :  $^1\text{H}$  NMR (300 MHz,  $\text{CDCl}_3$ ) spectrum of compound **5**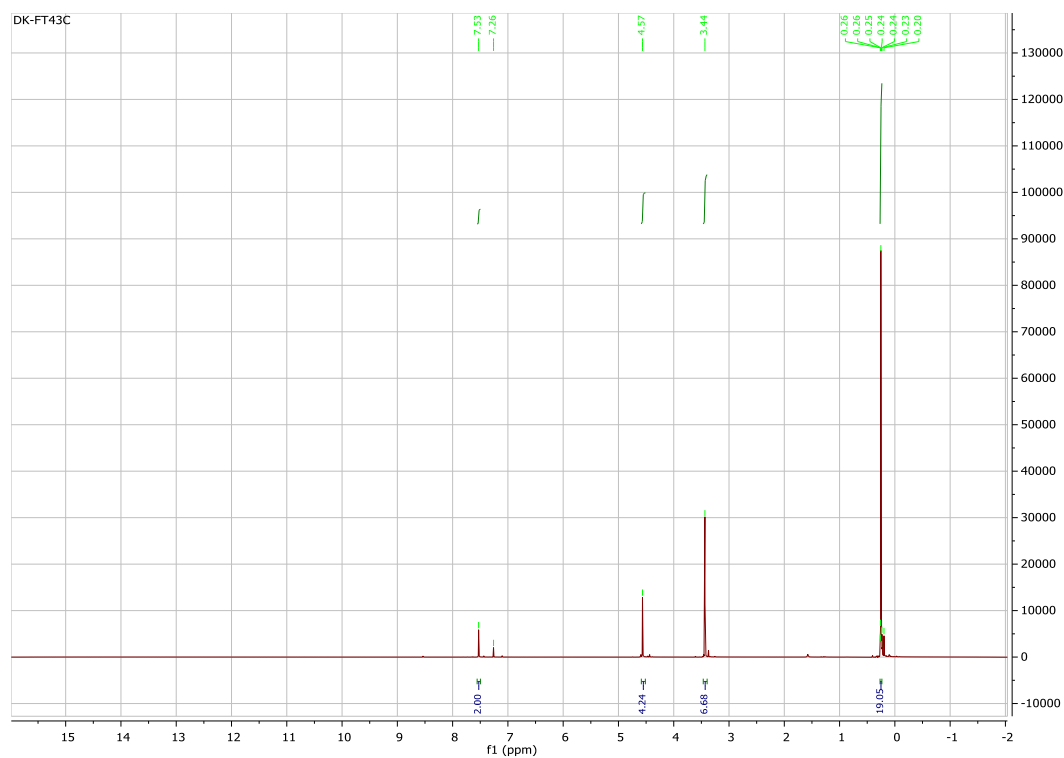Figure S10 :  $^{13}\text{C}$  NMR (300 MHz,  $\text{CDCl}_3$ ) spectrum of compound **5**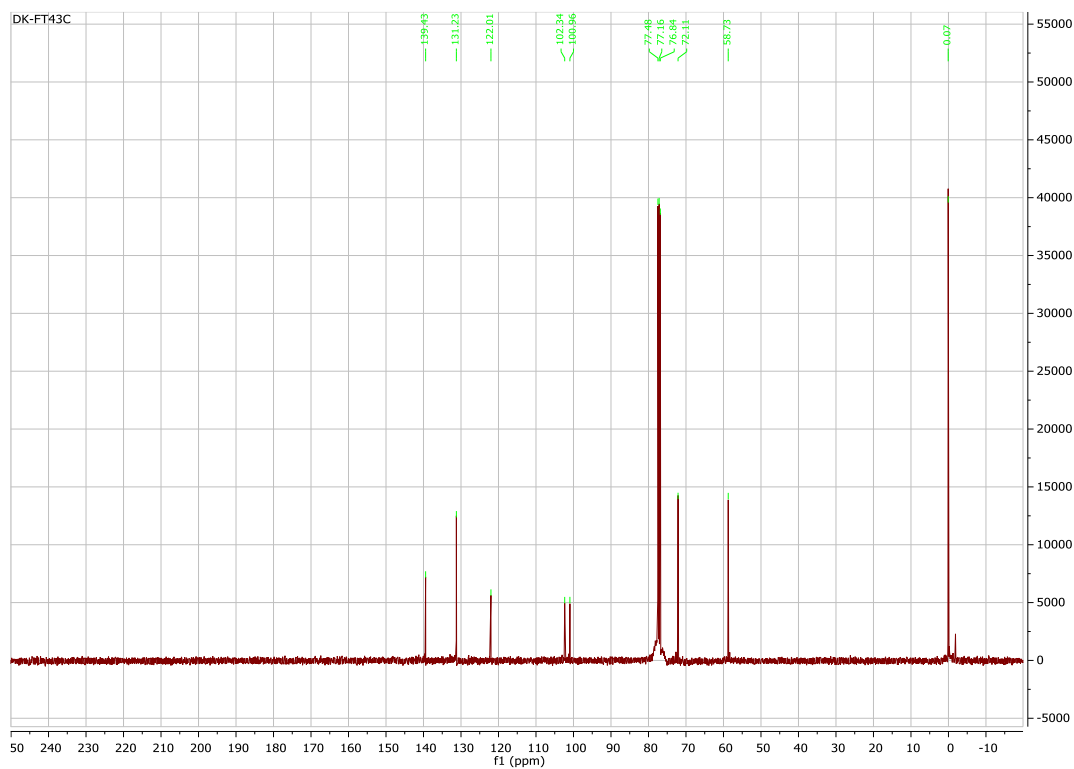

Figure S11 :  $^1\text{H}$  NMR (300 MHz,  $\text{CDCl}_3$ ) spectrum of compound **6**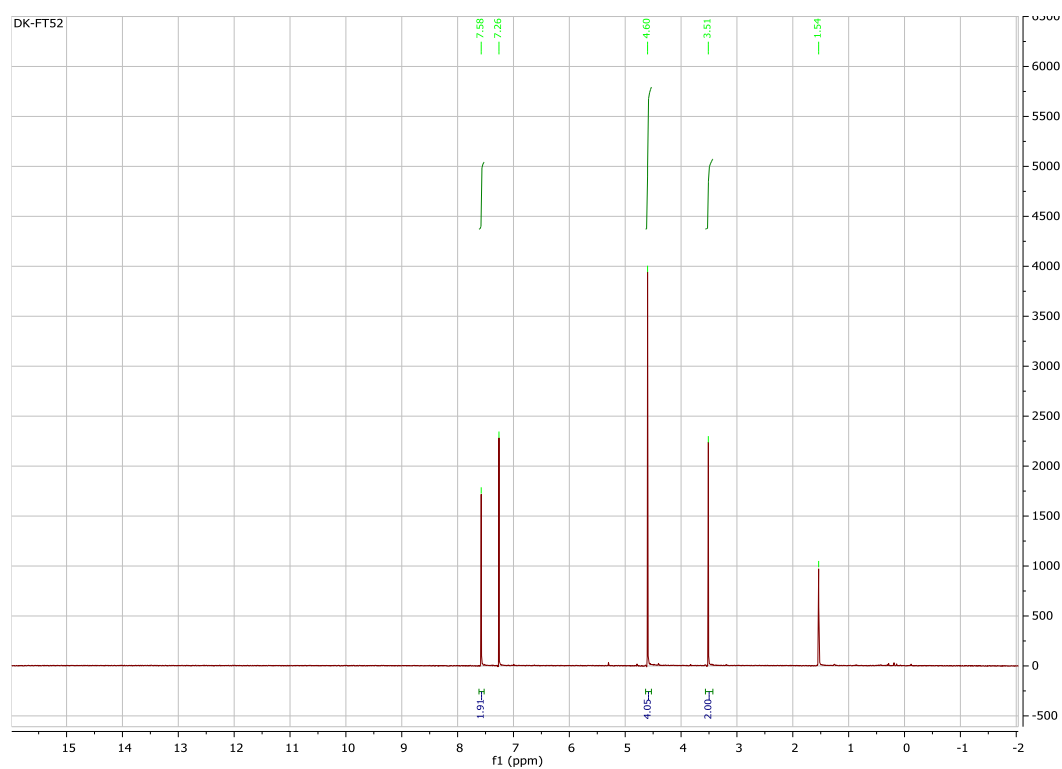Figure S12 :  $^{13}\text{C}$  NMR (300 MHz,  $\text{CDCl}_3$ ) spectrum of compound **6**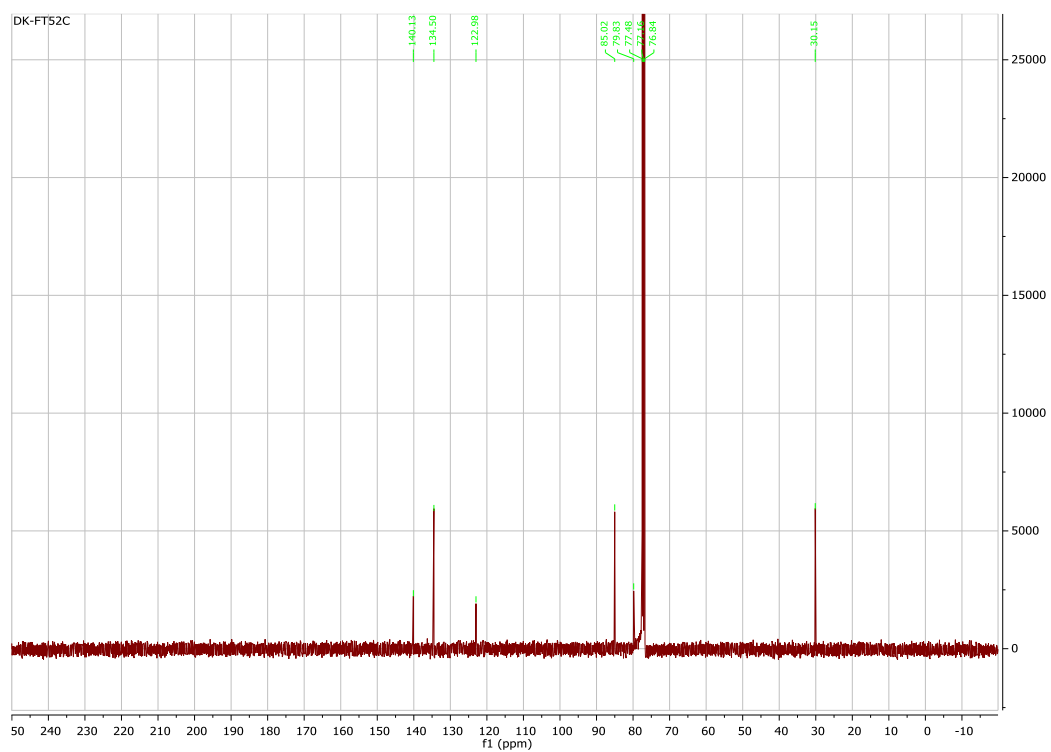



Figure S13 :  $^1\text{H}$  NMR (300 MHz,  $\text{CDCl}_3$ ) spectrum of compound **7**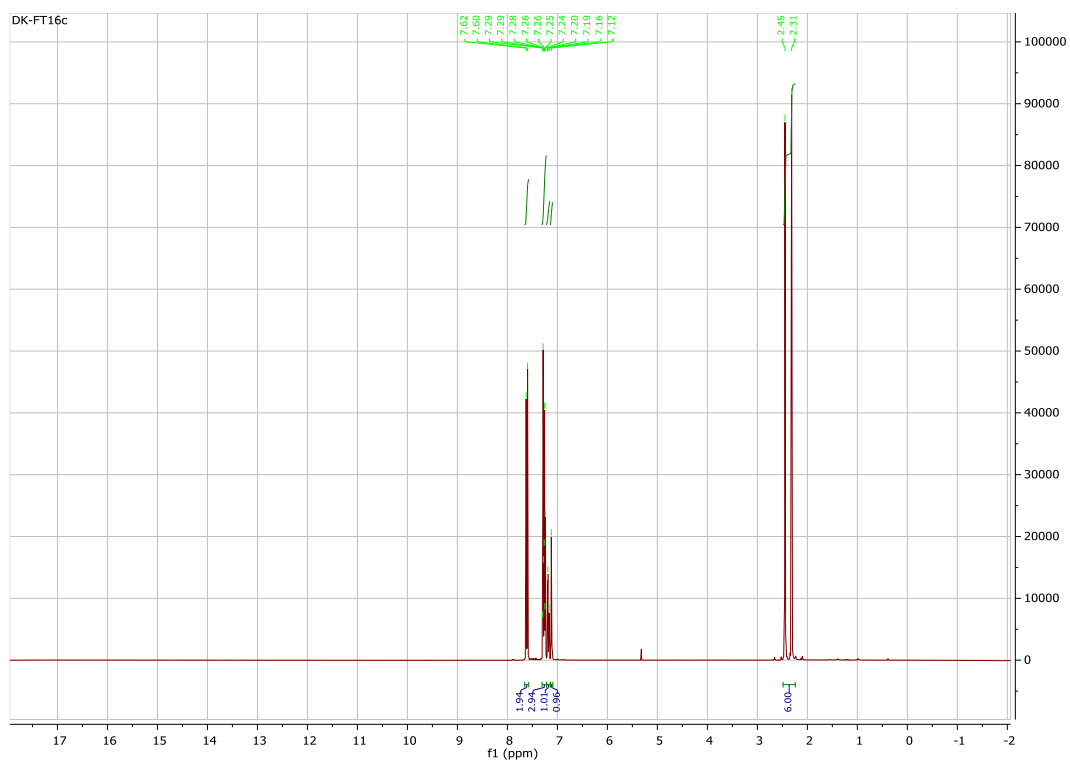Figure S14 :  $^{13}\text{C}$  NMR (300 MHz,  $\text{CDCl}_3$ ) spectrum of compound **7**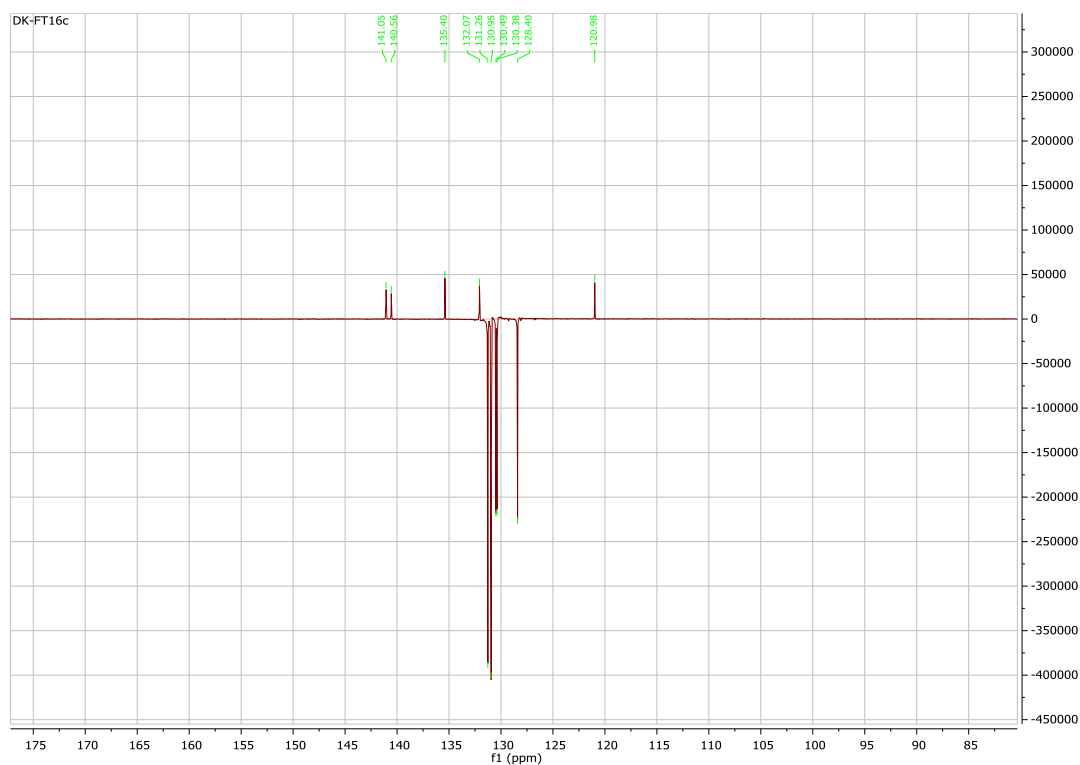

Figure S15 :  $^1\text{H}$  NMR (300 MHz,  $\text{CDCl}_3$ ) spectrum of compound **8b**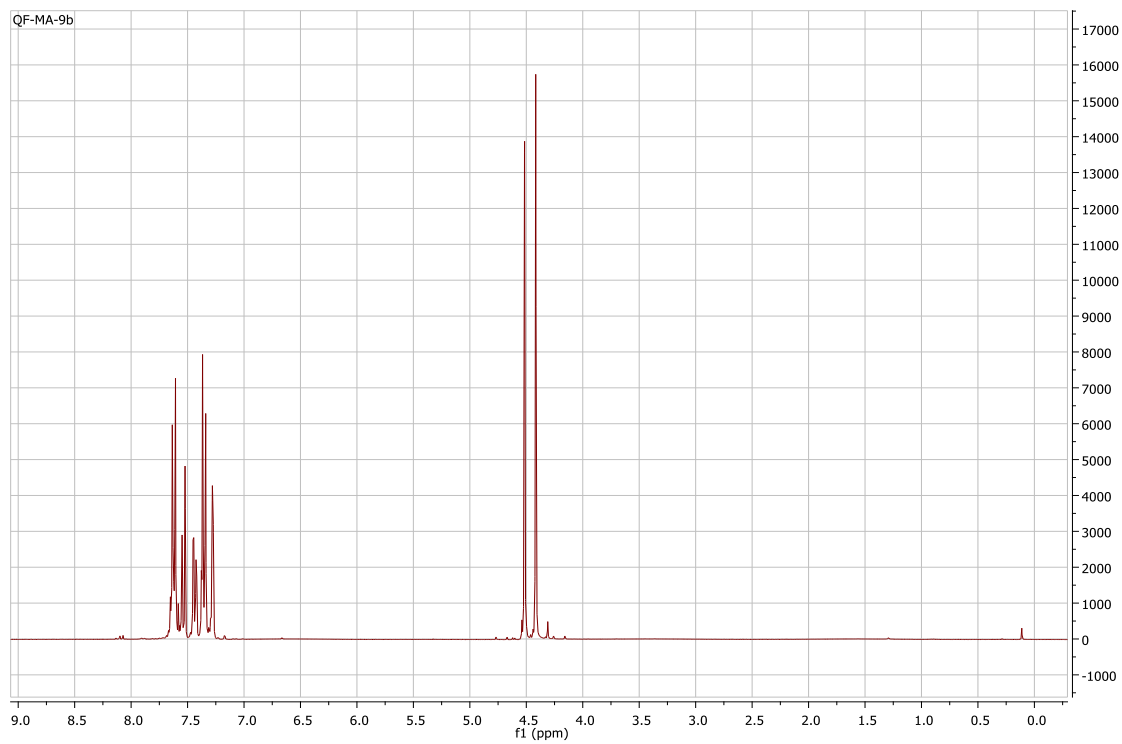Figure S16 :  $^{13}\text{C}$  NMR (300 MHz,  $\text{CDCl}_3$ ) spectrum of compound **8b**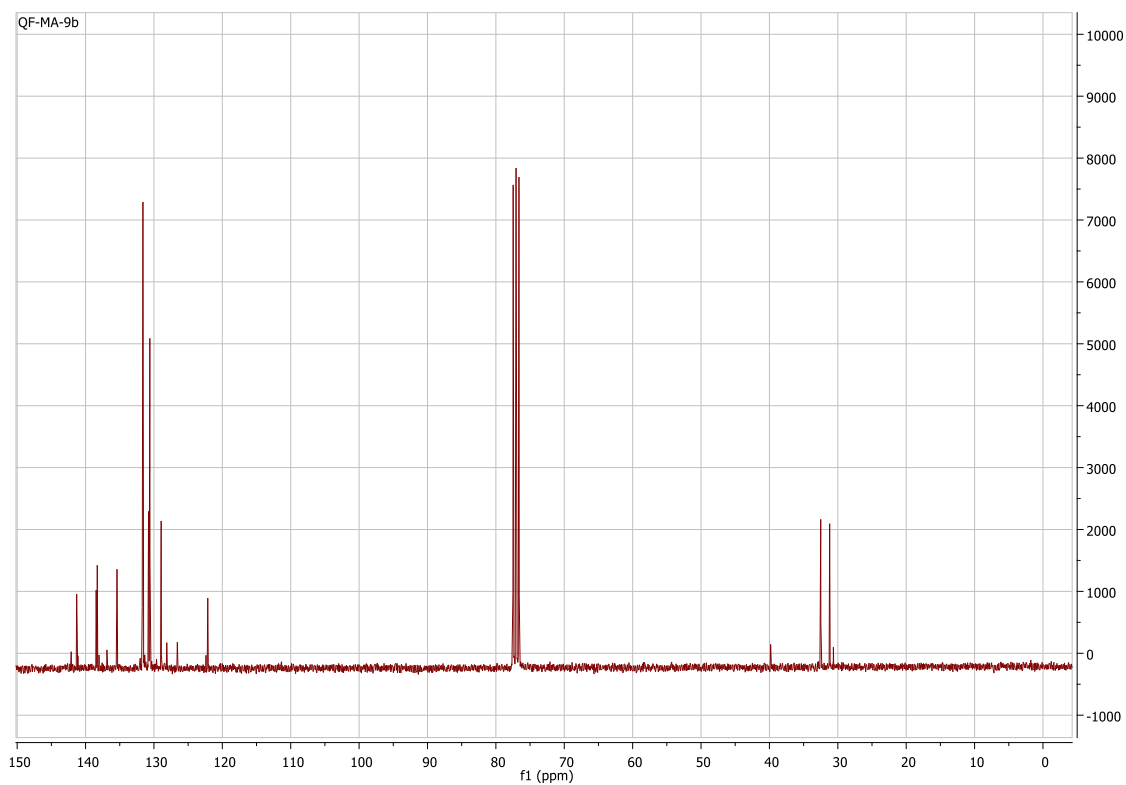

Figure S17 :  $^1\text{H}$  NMR (300 MHz,  $\text{CDCl}_3$ ) spectrum of compound **9a**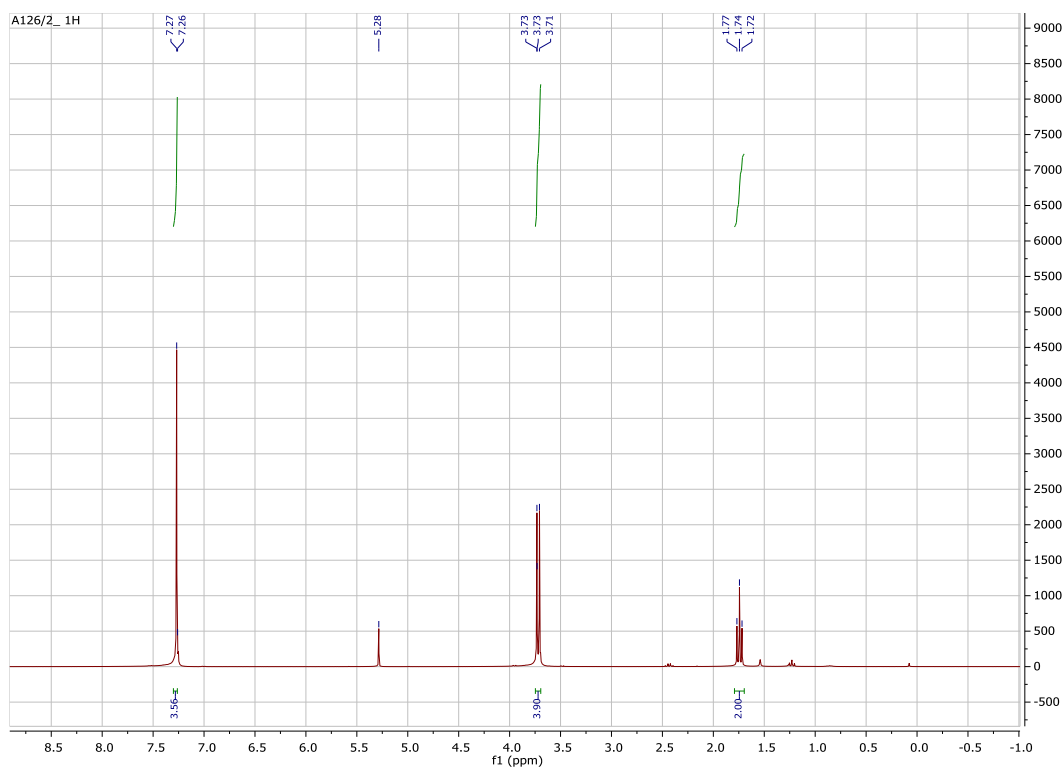Figure S18 :  $^{13}\text{C}$  NMR (300 MHz,  $\text{CDCl}_3$ ) spectrum of compound **9a**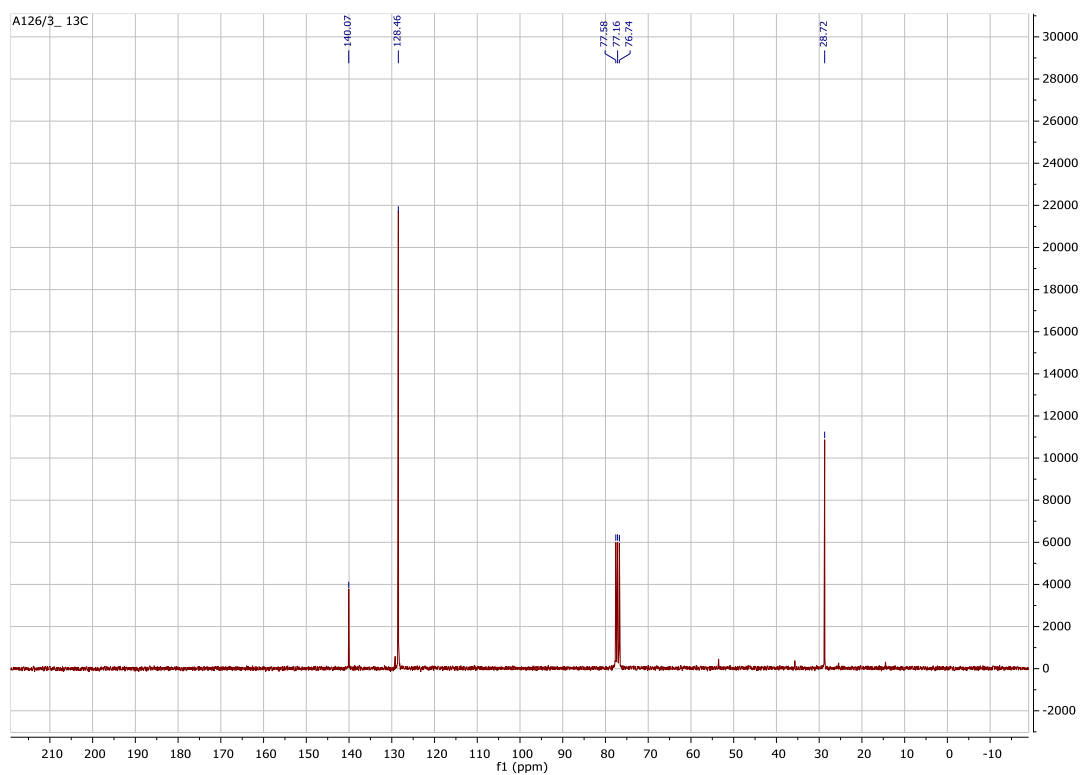

Figure S19 :  $^1\text{H}$  NMR (300 MHz,  $\text{CDCl}_3$ ) spectrum of compound **10a**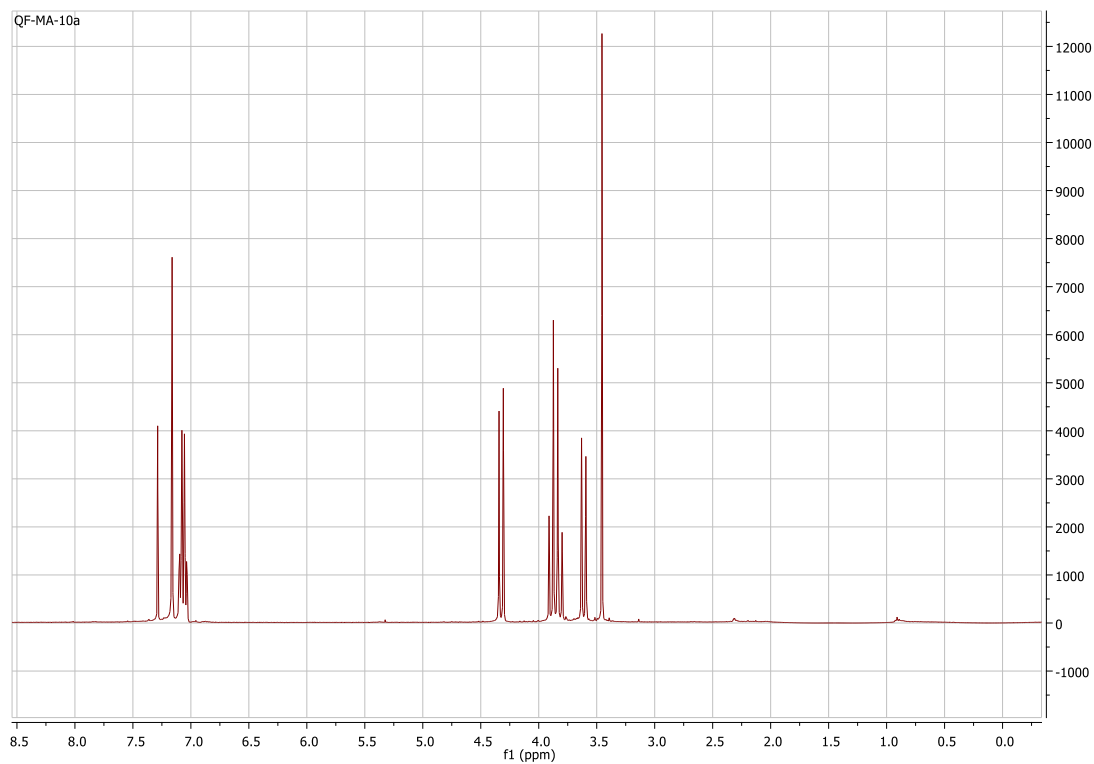Figure S20 :  $^{13}\text{C}$  NMR (300 MHz,  $\text{CDCl}_3$ ) spectrum of compound **10a**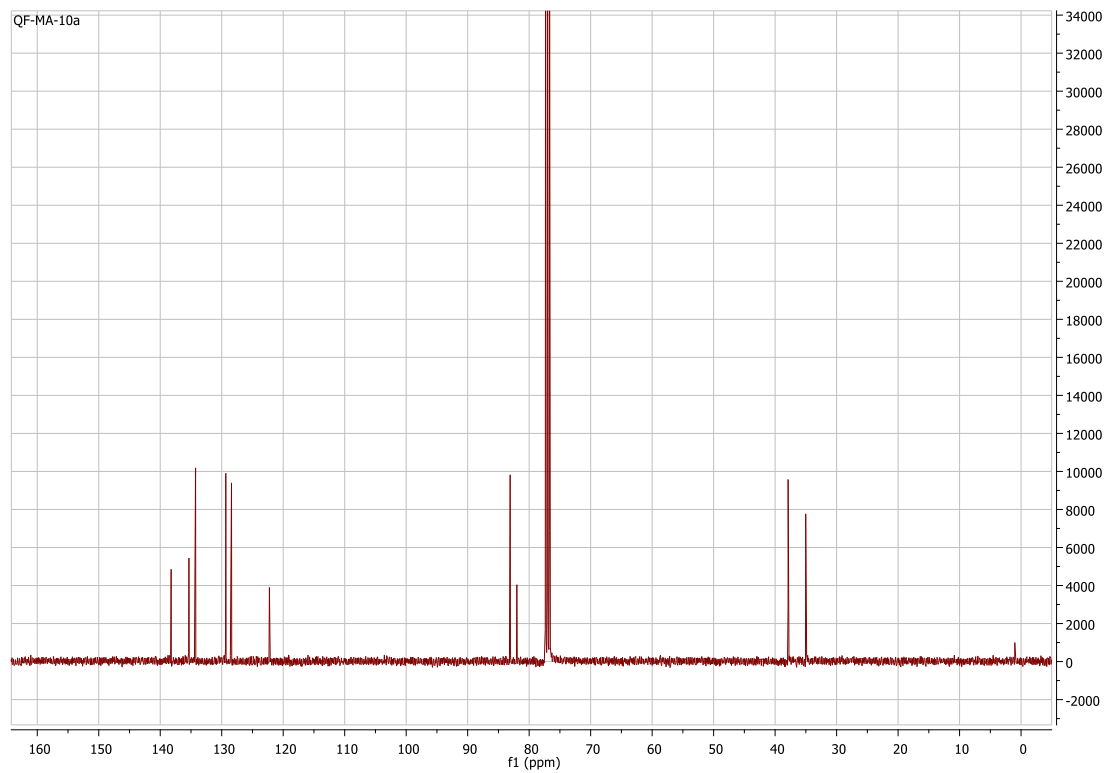

Figure S21 :  $^1\text{H}$  NMR (300 MHz,  $\text{CDCl}_3$ ) spectrum of compound P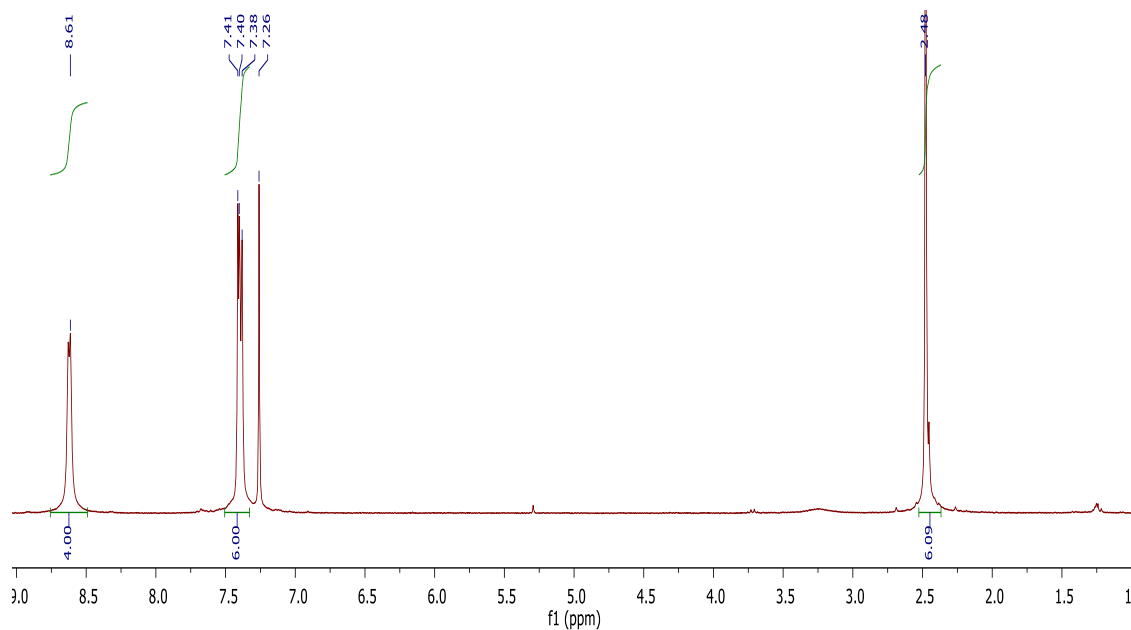Figure S22 :  $^{13}\text{C}$  NMR (300 MHz,  $\text{CDCl}_3$ ) spectrum of compound P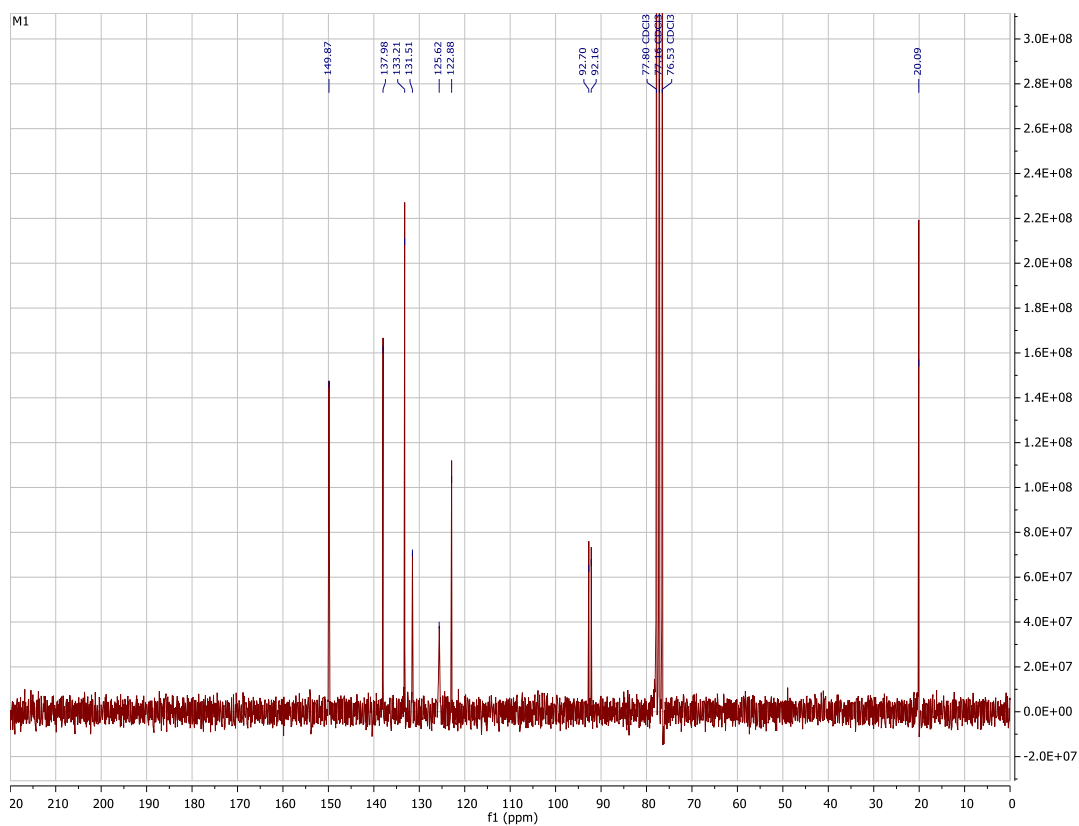

Figure S23 :  $^1\text{H}$  NMR (300 MHz,  $\text{CDCl}_3$ ) spectrum of compound C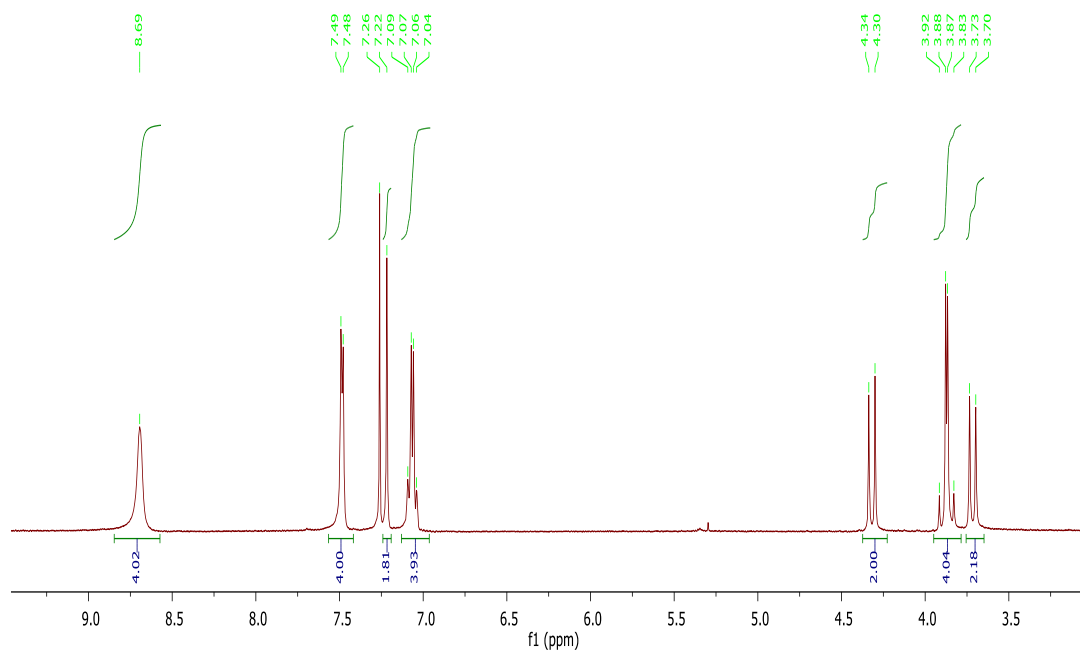Figure S24 :  $^{13}\text{C}$  NMR (300 MHz,  $\text{CDCl}_3$ ) spectrum of compound C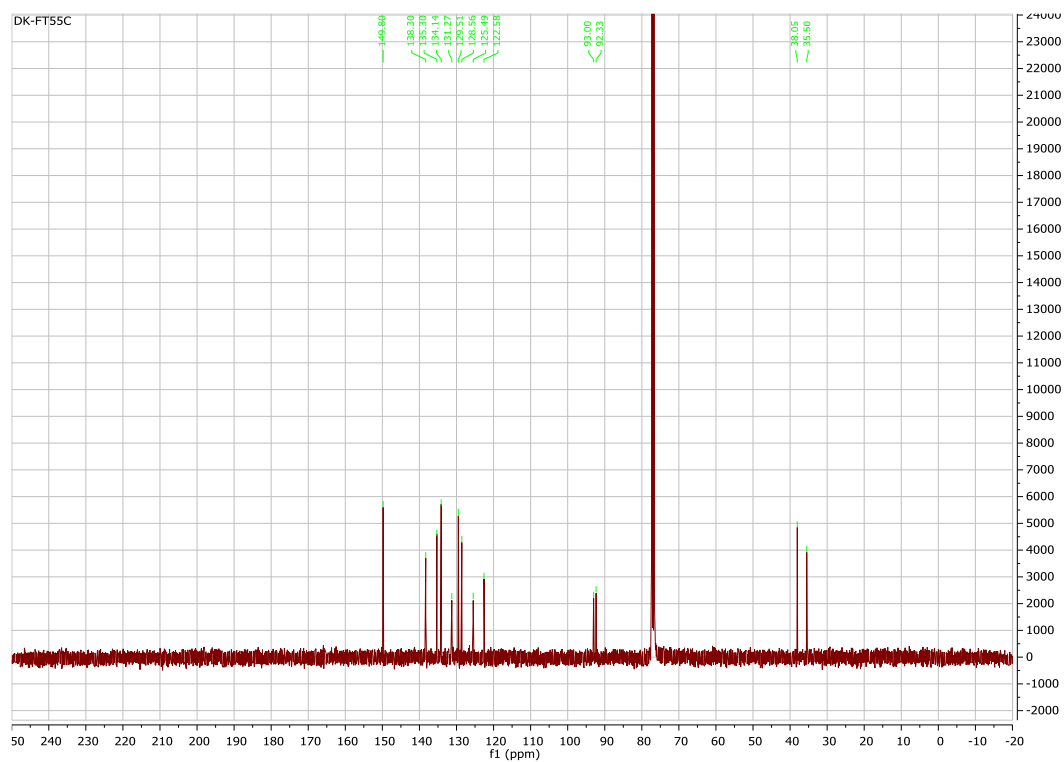

Figure S25 :  $^1\text{H}$  NMR (300 MHz,  $\text{CDCl}_3$ ) spectrum of compound JT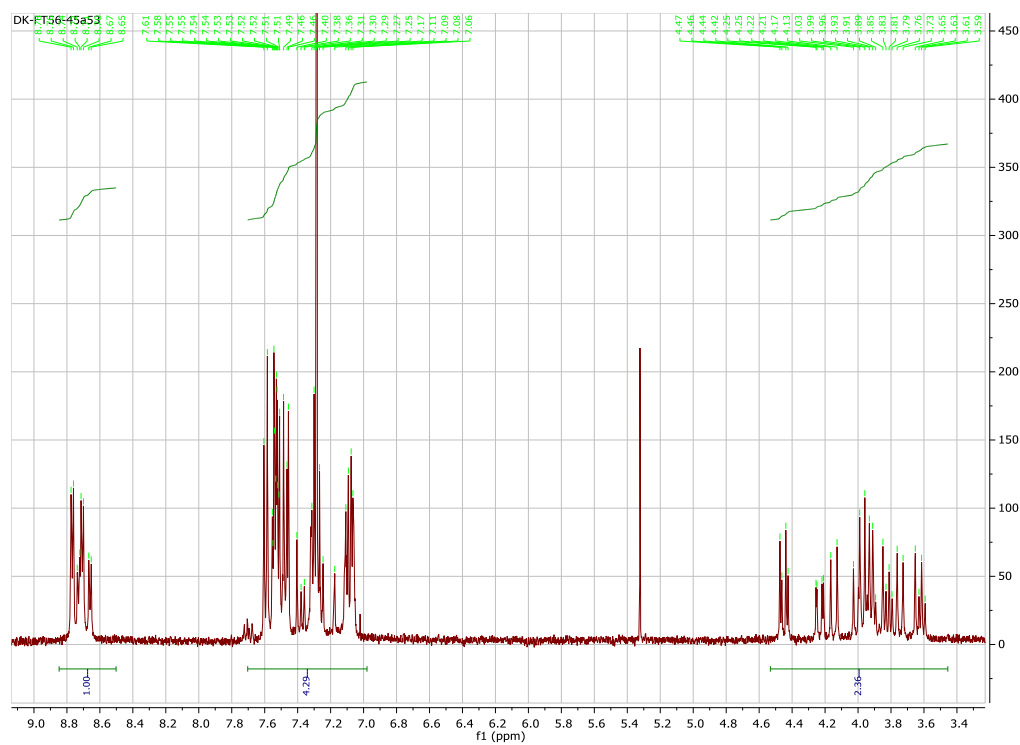

Figure S26 : HRMS for compound P : (EI) m/z (%) for C<sub>22</sub>H<sub>16</sub>N<sub>2</sub>; calcd 308.1313; found 308.1315.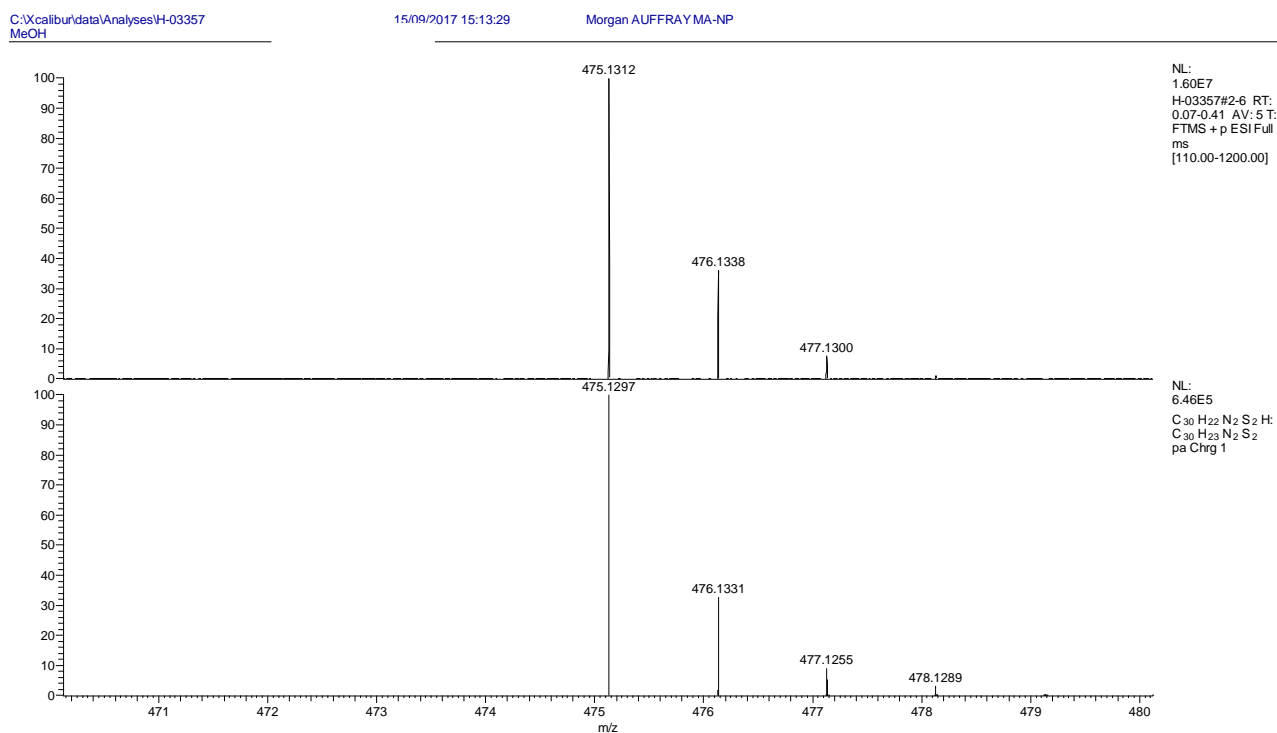

Error = 3.1 ppm Relative intensity (%) 100

Calcul of monoisotopic masses – 1.00728 Th (-H<sup>+</sup>).  
– 22.98922 Th (-Na<sup>+</sup>).  
– 38.96316 Th (-K<sup>+</sup>).

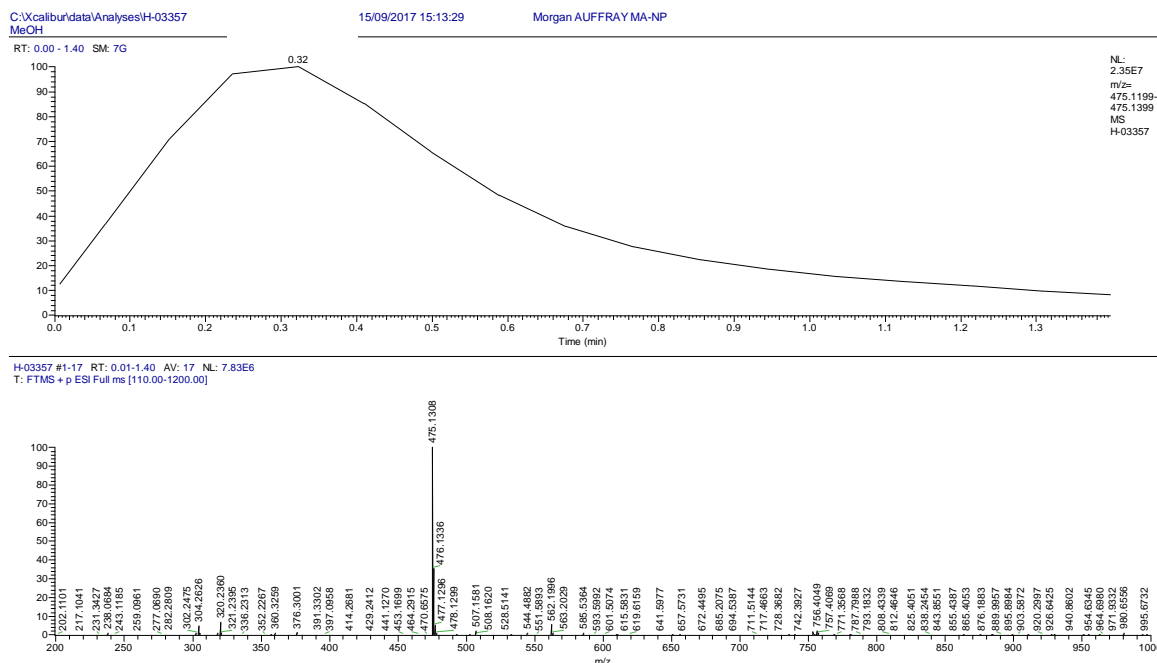



Figure S27: HRMS for compound C : (EI) m/z (%) for C<sub>30</sub>H<sub>22</sub>N<sub>2</sub>S<sub>2</sub>; calcd 474.1224; found 474.1224.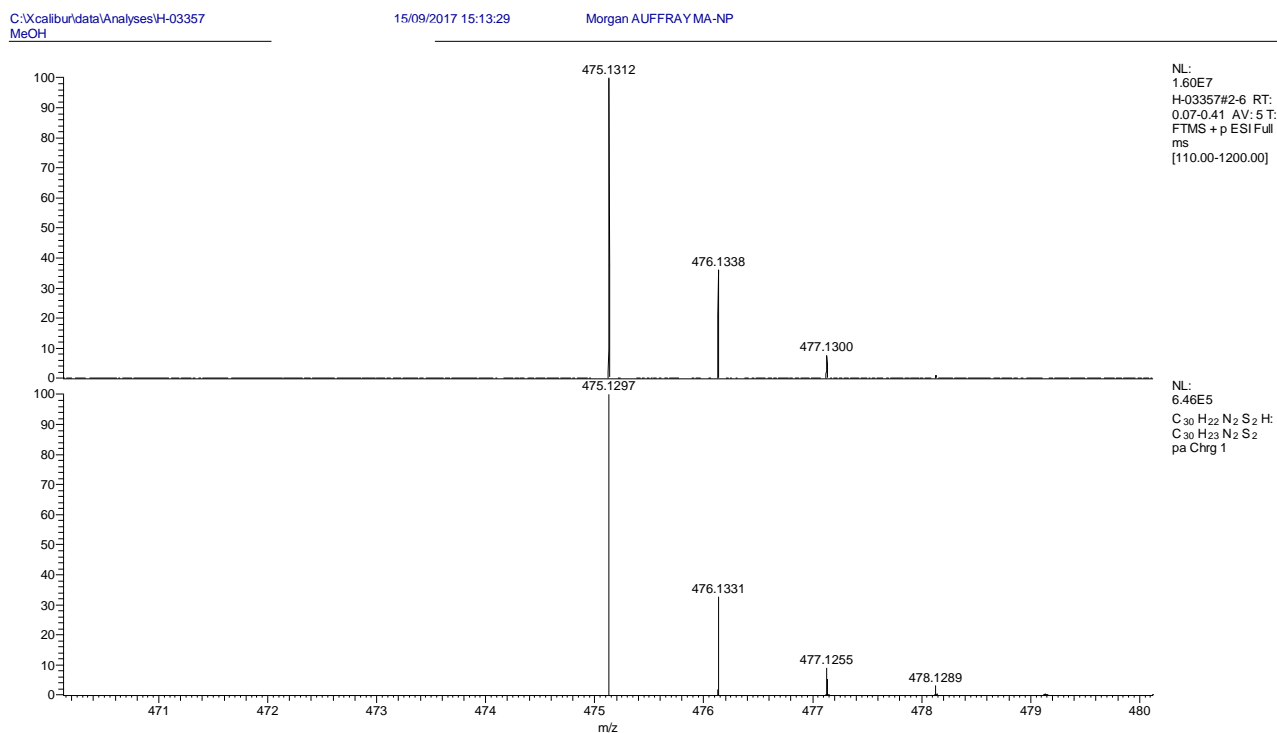

Error = 3.1 ppm Relative intensity (%) 100

Calcul of monoisotopic masses – 1.00728 Th (-H<sup>+</sup>).  
–22.98922 Th (-Na<sup>+</sup>).  
–38.96316 Th (-K<sup>+</sup>).

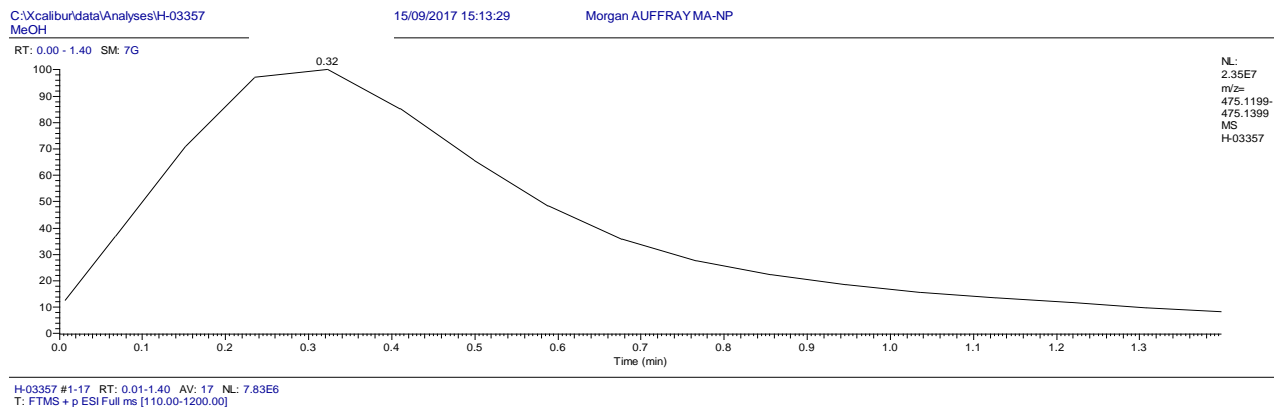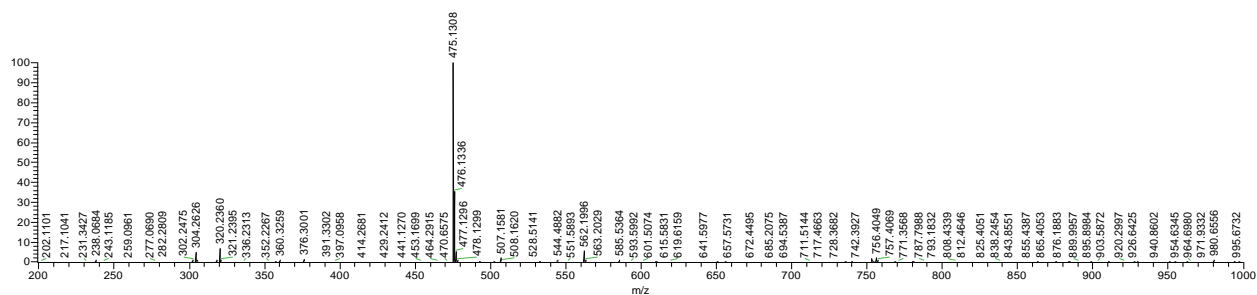

Figure S28 : HRMS for compound JT : (EI) m/z (%) for C<sub>36</sub>H<sub>25</sub>N<sub>2</sub>S<sub>2</sub>; calcd 628.0643; found 628.0642.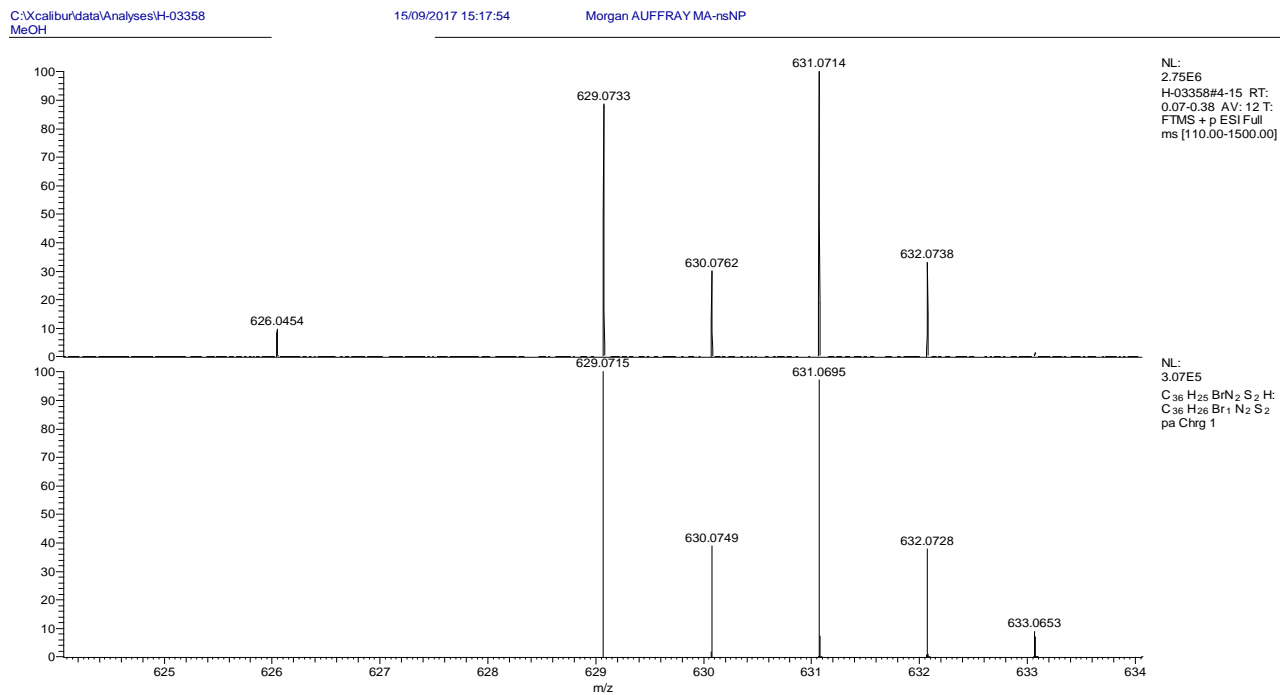

Error = 2.8 ppm ; Relative intensity (%) 100

Calcul of monoisotopic masses – 1.00728 Th (-H<sup>+</sup>),  
– 22.98922 Th (-Na<sup>+</sup>),  
– 38.96316 Th (-K<sup>+</sup>).

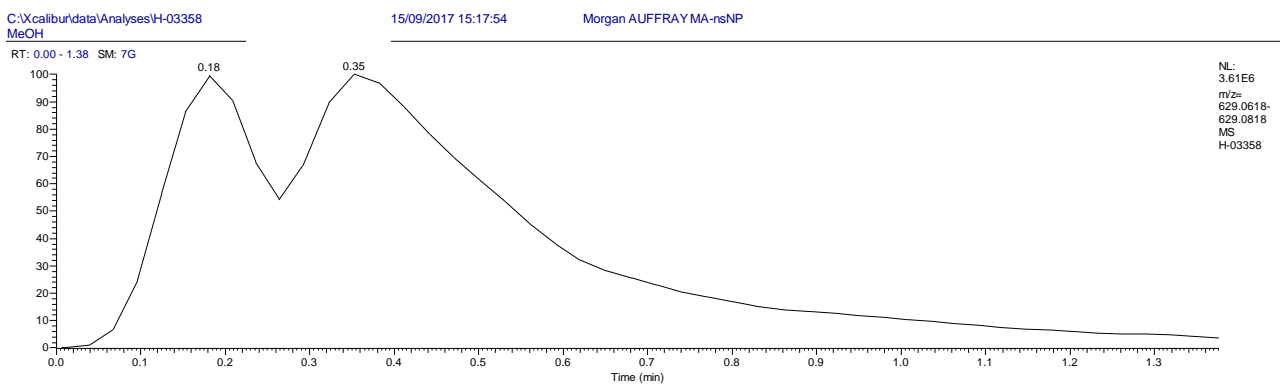

H-03358 #2-49 RT: 0.01-1.38 AV: 48 NL: 1.30E6  
T: FTMS + p ESI Full ms [110.00-1500.00]

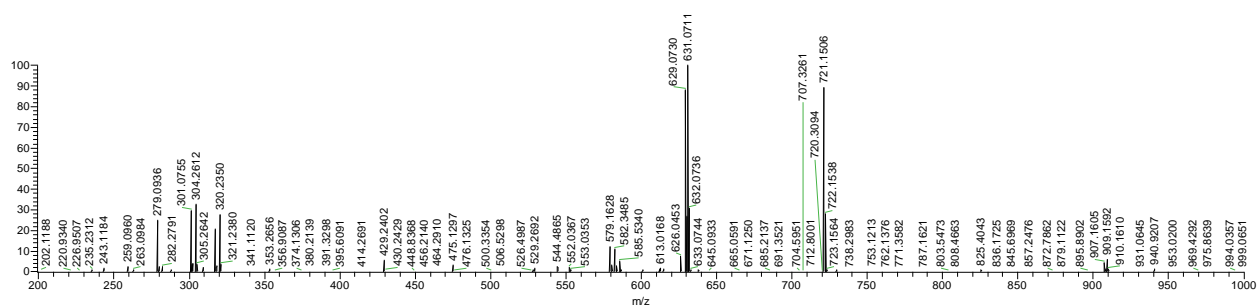

Figure S29 : IR spectra spectra recorded on bulk after evaporation or filtration of the supramolecular complexes prepared.....18 in solution by simply mixing P with bis(benzonitrile)-palladium(II) for coordination (P-PdII), terephthalic acid for hydrogen bond (P-TPA) and finally 1,4-diiodobenzene for halogen bond (P-IPI).

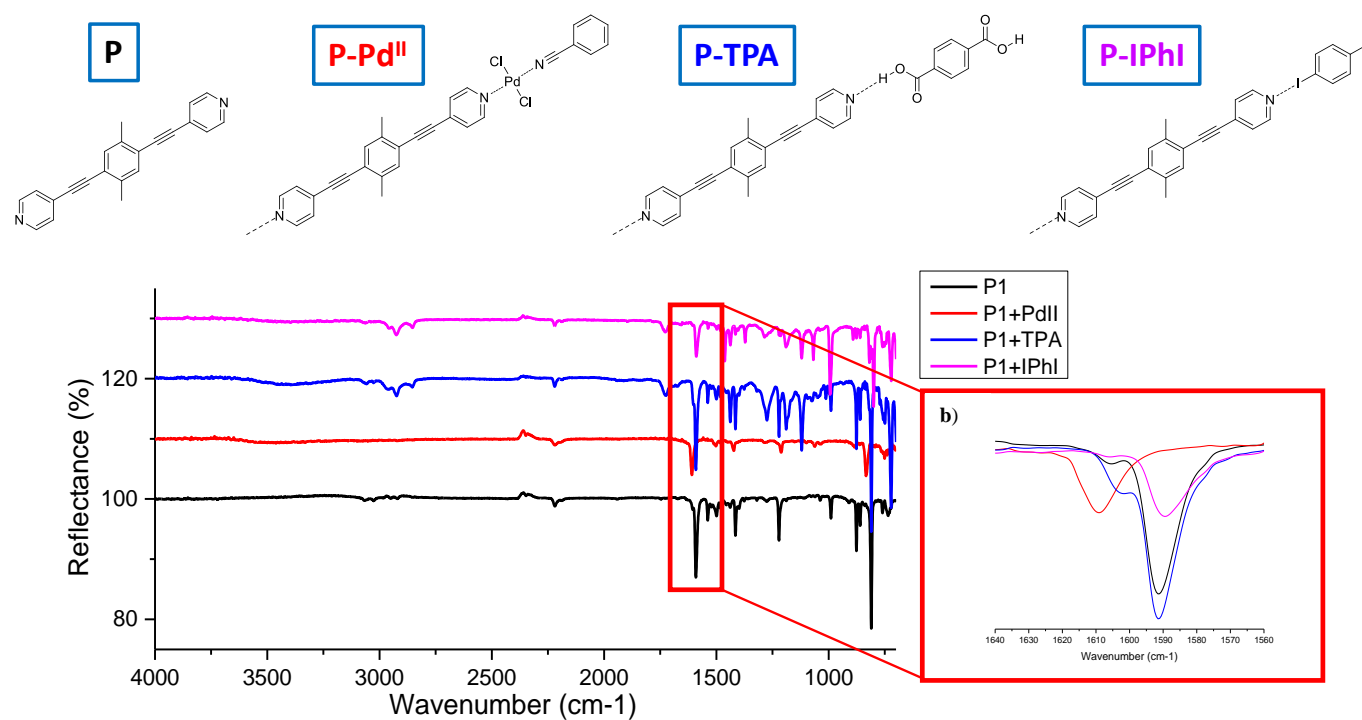

Supplement: d0nj00110d1.pdf [file d0nj00110d1.pdf]
